# Supplementary material
Source: PubMed Central journal article supplement (PMC3484948)
Supplement: 10.3163.1536-5050.100.4.015.sg001.pdf [file 10.3163.1536-5050.100.4.015.sg001.pdf]

## **Development of a post-master's online certificate in health sciences librarianship**

**Ester Saghafi, MEd, MLS; Nancy H. Tannery, MLS; Barbara A. Epstein, MSLS, AHIP; Susan Alman, PhD; Christinger Tomer, PhD**

### **APPENDIX**

#### **Certificate of advanced study in health sciences librarianship (HealthCAS) capstone: poster presentations**

Poster presentations for HealthCAS, Health Sciences Library System and School of Information Sciences, University of Pittsburgh, [www.ischool.pitt.edu/health](http://www.ischool.pitt.edu/health) and [www.hsls.pitt.edu/healthcas/](http://www.hsls.pitt.edu/healthcas/). Presented Saturday, May 14, 2011, at the University of Minnesota Bio-Medical Library, 505 Essex Street SE, Minneapolis, MN.

#### **Poster titles**

Embedded Librarianship: A Case Study of Best Practices

Enhancing Faculty Services: A Collaborative Approach

Identify Underserved Populations in a Metropolitan Multibranch Public Library District and Target Collection Development and Programs to Meet User Needs

Impact of Viewing a Patient Education Video prior to Colonoscopy on Knowledge, Anxiety, and Satisfaction

Information-Seeking Behavior after the Closure of a Hospital Library: A Case Study

Librarian Involvement in Problem-based Learning: A Student Perspective

Library Outreach to Occupational Therapy Fieldwork Educators

Library Services for People with Disabilities Twenty Years after the Americans with Disabilities Act: A Survey Updated

Marketing a Consumer Health Collection in a Pediatric Hospital

Next-Generation Discovery Systems and Biomedical Literature: Is Discovery Improved?

Online Journal Backfiles: An Analysis of Actual and Projected Use

Rethinking Library Service to Distance Education Students: Analyzing the Embedded Librarian Model
