# Supplementary material
Source: PubMed Central journal article supplement (PMC3484948)
Supplement: 10.3163.1536-5050.100.4.015.sg002.pdf [file 10.3163.1536-5050.100.4.015.sg002.pdf]

**Development of a post-master’s online certificate in health sciences librarianship**

**Ester Saghafi, MEd, MLS; Nancy H. Tannery, MLS; Barbara A. Epstein, MSLS, AHIP; Susan Alman, PhD; Christinger Tomer, PhD**

**Table 1**

Matching the certificate of advanced study in health sciences librarianship (HealthCAS) course objectives to the Medical Library Association's (MLA's) *Competencies for Lifelong Learning and Professional Success*

| <b>MLA Competencies for Lifelong Learning and Professional Success</b>                                                                                                                                                                                                                    | <b>Online HealthCAS program</b>                                                                                                                                                                                                                                                                                                                           |
|-------------------------------------------------------------------------------------------------------------------------------------------------------------------------------------------------------------------------------------------------------------------------------------------|-----------------------------------------------------------------------------------------------------------------------------------------------------------------------------------------------------------------------------------------------------------------------------------------------------------------------------------------------------------|
| 1. Understand the health sciences and health care environment and the policies, issues, and trends that impact that environment.<br>2. Know and understand the application of leadership, finance, communication, and management theory and techniques.                                   | Course 1<br>Examination of the health care environment and professional roles. Consideration of internal and external factors: finances, regulations, and legislation. Exploration of various health care settings, research and grants, evidence-based practice, patient-centered focus, and information technologies used by health care professionals. |
| 3. Understand the principles and practices related to providing information services to meet users’ needs.<br>4. Have the ability to manage health information resources in a broad range of formats.<br>5. Understand and use technology and systems to manage all forms of information. | Course 2<br>Selection, collection, and access to print and electronic library and information resources and services in the health care environment. Budgets and justification of selections, vendor relations, licensing, and scholarly holdings management. Examination of technologies used in health sciences library settings.                       |
| 6. Understand curricular design and instruction and have the ability to teach ways to access, organize, and use information.<br>7. Understand scientific research methods and have the ability to critically examine and filter research literature from many related disciplines.        | Course-3<br>Examination of reference services with special focus on evidence-based medicine, systematic reviews, and meta analyses; instructional and consulting services; and embedded, clinical, and liaison services. Library services to special populations in the health care environment.                                                          |
| 7. Understand scientific research methods and have the ability to critically examine and filter research literature from many related disciplines.                                                                                                                                        | Individual Research Project<br>Research on a topic in the health sciences selected by the student and advisor and carried out with scheduled reports to the advisor. A maximum of three credits may be earned under this course number.                                                                                                                   |
